# Supplementary material for: Efficient energy transfer from ZnO to Nd3+ ions in Nd-doped ZnO films deposited by magnetron reactive sputtering
Source: Royal Society of Chemistry journal article supplement (doi:10.1039/c4tc00980k), 2014-01-01
Supplement: c4tc00980k1.pdf [file c4tc00980k1.pdf]

## Supplementary material

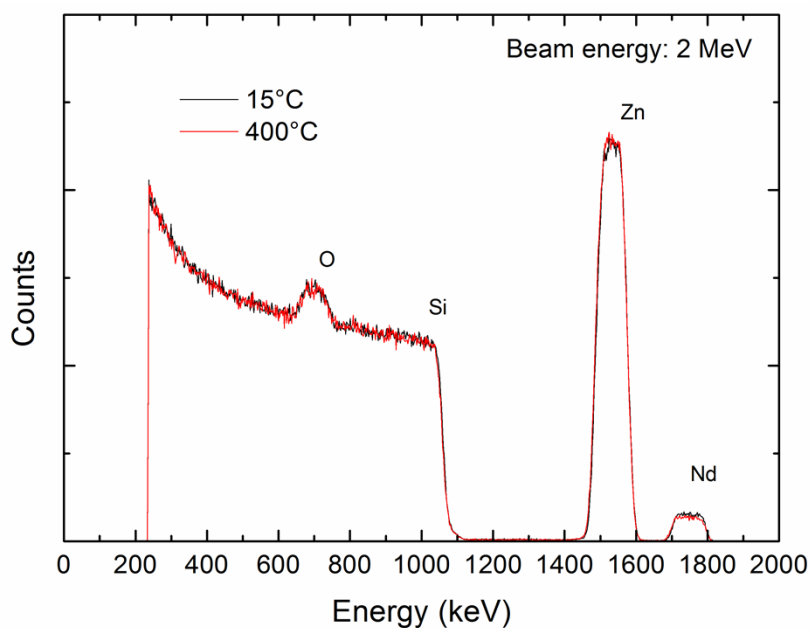

Fig. S1 – Selected RBS spectra of ZnO:Nd (1.6 %) films deposited at different temperatures. The flat Nd profile indicate a uniform distribution along the growth direction.

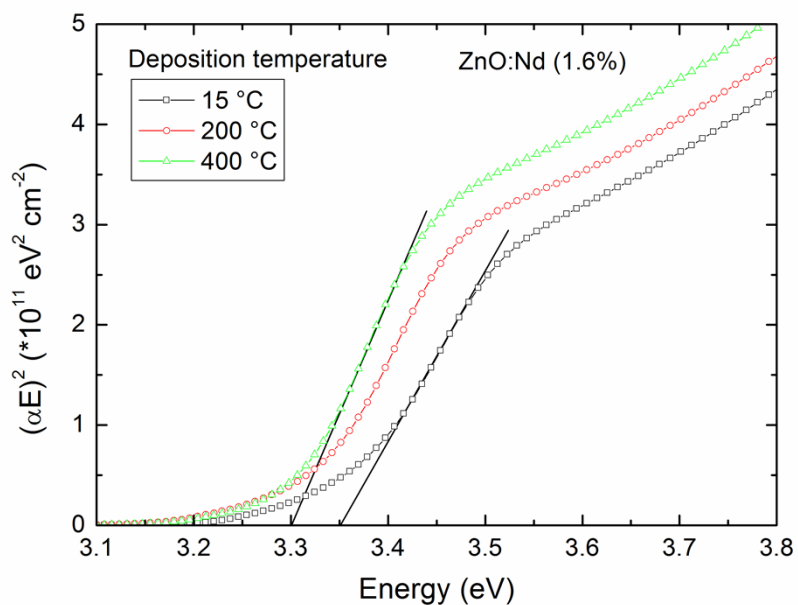

Fig. S2 – Tauc plot of the ZnO absorption coefficient of films grown at different temperatures. The values of  $\alpha$  have been calculated from the extinction coefficient obtained by ellipsometric measurements.

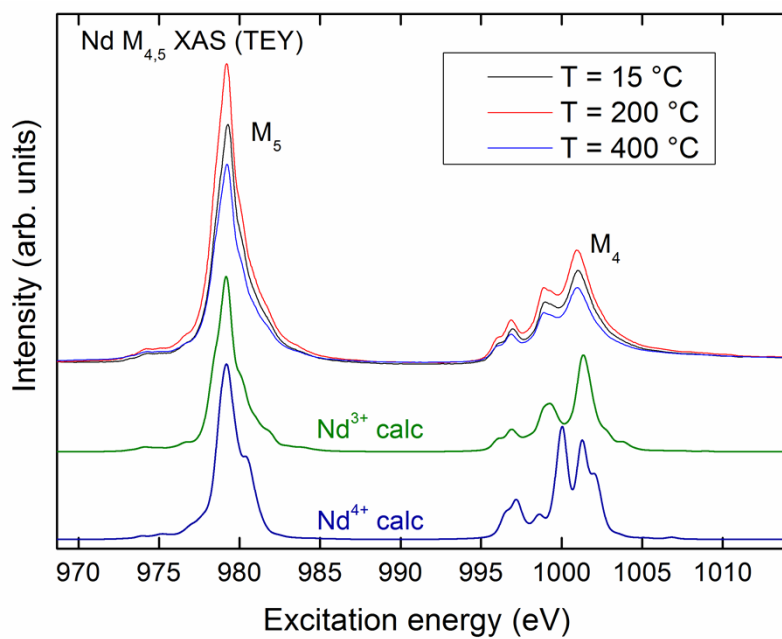

Fig. S3 - Nd  $M_{4,5}$  XAS (TEY) measurement of samples deposited at different temperatures. *Ab initio* edge calculations for  $\text{Nd}^{3+}$  and  $\text{Nd}^{4+}$  are reported for comparison. TEY signal only sounds the first few nanometers of material.
